# Supplementary material for: Facile and fast synthesis of highly active Lewis acid MWW zeolite from pure silica ITQ-1
Source: Royal Society of Chemistry journal article supplement (doi:10.1039/d2qi00611a), 2022-01-01
Supplement: d2qi00611a1.pdf [file d2qi00611a1.pdf]

## Supplementary information

# Facile and fast synthesis of highly active Lewis acid MWW zeolite from a pure silica ITQ-1

Tianlong Wang,<sup>#a</sup> Wei Huang,<sup>#a</sup> He Han,<sup>b</sup> Jiaying Zhang,<sup>b</sup> Huifang Wu,<sup>a</sup> Xin Yan,<sup>a</sup> Yuanjuan Jiang,<sup>a</sup>  
Lu Fang,<sup>a</sup> Bochun Zhang,<sup>a</sup> Xinwen Guo,<sup>\*b</sup> Limin Ren<sup>\*a</sup>

a. Zhang Dayu School of Chemistry, Dalian University of Technology, Dalian 116024, PR China.

b. State Key Laboratory of Fine Chemicals, PSU - DUT Joint Center for Energy Research, School of Chemical Engineering, Dalian University of Technology, Dalian 116024, PR China.

## Experimental

### Materials and reagents

Hexamethyleneimine (HMI, 98 wt%, Shanghai Annaiji Chemical Reagent Co.), tetrapropylammonium hydroxide (TPAOH, 40 wt% in water, Shanghai Annaiji Chemical Reagent Co.), fumed silica (Cab-o-sil M5), boric acid (99.5 wt%, Tianjin Damao Chemical Reagent Factory), stannic chloride pentahydrate ( $\text{SnCl}_4 \cdot 5\text{H}_2\text{O}$ , 99 wt%, Tianjin Damao Chemical Reagent Factory), ethanol (99 wt%, Tianjin Fuyu Fine Chemical Reagent Co.), D-glucose (99.5 wt%, Shanghai methanol-D4 ( $\text{CD}_3\text{OD}$ , 99.8 wt%, Shanghai Annaiji Chemical Reagent Co.), deuterium oxide ( $\text{D}_2\text{O}$ , 99 wt%, Shanghai Annaiji Chemical Reagent Co.), nitric acid (65~68 wt%, Xilong Scientific Co., Ltd.), sodium chloride (NaCl, 99 wt%, Tianjin Damao Chemical Reagent Factory), N,N,N-trimethyl-1-adamantammonium hydroxide (TMAdaOH, 25 wt% in water, Shanghai Annaiji Chemical Reagent Co.).

### Synthesis of B-MWW.

In a typical synthesis, a solution was obtained by dissolving 0.62 g of boric acid into 30 g of deionized water. Subsequently, 3.00 g of fumed silica, 0.30 g of Si-MWW seeds and 3.52 g of HMI were added into the above solution. Then, the mixed gel was placed in an oil bath at 80 °C and stirred for evaporation to remove the water completely, and a near dry powder was obtained, denoted as mixture A ( $\text{SiO}_2$ : 0.2 $\text{H}_3\text{BO}_3$ : 0.71HMI). Then mixture A was transferred into a small PTFE container, and the small container was placed in a PTFE lined stainless steel autoclave with a mixed solution B (2.25g of  $\text{H}_2\text{O}$  and 3.52g of HMI) at the bottom of the PTFE liner. After heated at 170 °C for 4 days under static conditions, the sample was filtered and washed with abundant deionized water until the pH was less than 8 and dried at 80 °C. The dried samples were calcined at 580 °C in a muffle furnace for 10 h to obtain B-MWW.

### Synthesis of deB-MWW

The above synthesized B-MWW zeolite was deboronated by treatment with 6 mol/L nitric acid (1 g zeolite/30 mL HNO<sub>3</sub>) in a round bottom flask under reflux for 24 h at 100 °C. The sample was centrifuged and washed with abundant deionized water until the pH reached 7 and finally dried at 80 °C overnight. The corresponding MWW zeolite was denoted as deB-MWW.

### **Synthesis of Sn-MWW (TPA)**

As a typical run, 0.508 g of tetrapropylammonium hydroxide (TPAOH, 40 wt%) was mixed with 7.20 g of deionized water and 0.0175 g of SnCl<sub>4</sub>·5H<sub>2</sub>O and stirred for 15 min. Then, pure silica ITQ-1 precursor (1.20 g) were added to the above solution and stirred for 2 h at room temperature. Then the final gel with the molar composition of SiO<sub>2</sub>: 0.004 SnO<sub>2</sub>: 0.05 TPAOH: 20H<sub>2</sub>O was transferred to a PTFE lined stainless steel autoclave and heated at 170 °C for 48 h under static conditions. The sample was filtered and washed with abundant deionized water until the pH was less than 8 and dried at 80 °C.

### **Catalytic Test**

Glucose isomerization reaction was carried out in stirred 20-mL thick-walled glass reactors (VWR) sealed with crimp tops (PTFE/silicone septum, VWR). All the reactants and products were analyzed by high performance liquid chromatography (HPLC) using a refractive index detector with a Bio-Rad Aminex HPX87C (300 x 7.8 mm) column (Phenomenex).

Table S1. Weight change during different growth stages for preparing of Sn-MWW-250

| Treatment time | Weight (g)    |         |
|----------------|---------------|---------|
|                | Mother sample | Product |
| 2 h            | 0.3           | 0.28    |
| 8 h            | 0.3           | 0.29    |
| 24 h           | 0.3           | 0.29    |
| 72 h           | 0.3           | 0.28    |

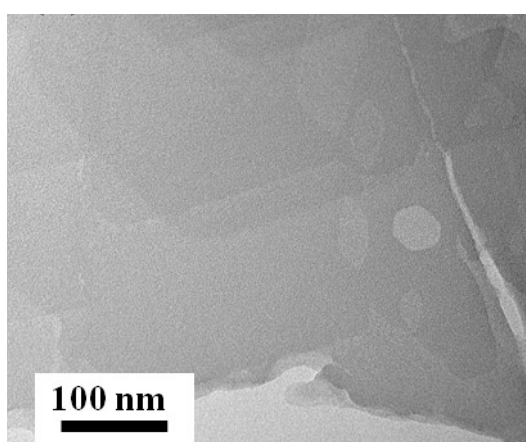

Fig. S1. TEM image of Sn-MWW-250.

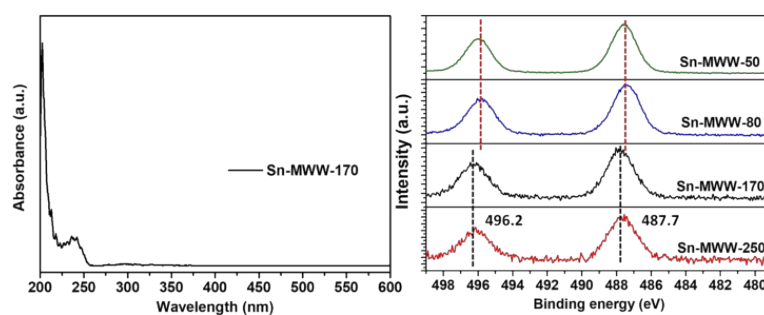

Fig. S2. (a) UV-vis spectrum of Sn-MWW-170 and (b) XPS spectra of Sn-MWW-50, Sn-MWW-80, Sn-MWW-170 and Sn-MWW-250.

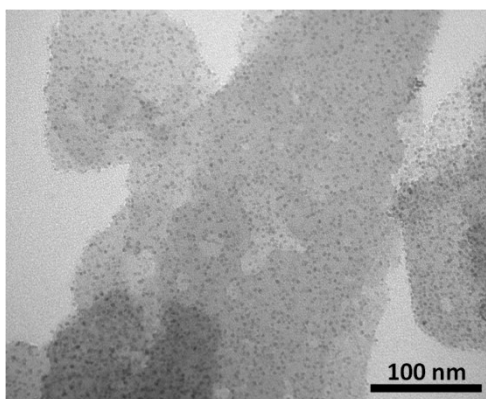

Fig. S3. TEM image of Sn-MWW-50.

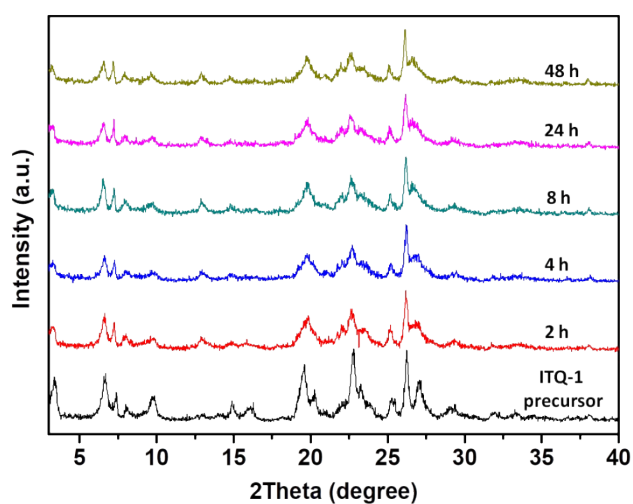

Fig. S4. XRD patterns of ITQ-1 precursor and products at different growth time (2-48 h), SDA/Si=1.0, SDA=HMI, ITQ-1 precursor as mother sample.

**Table S2. The pH of the secondary growth solution (TPAOH and HMI)**

| SDA(HMI)/Si | pH    | SDA(TPAOH)/Si | pH    |
|-------------|-------|---------------|-------|
| 0.2         | 11.94 | 0.05          | 12.60 |
| 0.4         | 12.09 | 0.2           | 13.36 |
| 1.0         | 12.18 | 0.4           | 13.68 |

The pH of the solution is measured at room temperature.

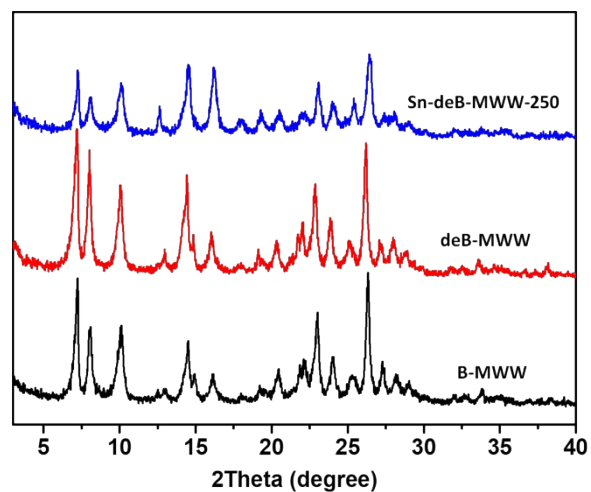

Fig. S5. XRD patterns of Sn-deB-MWW-250, deB-MWW and B-MWW samples.

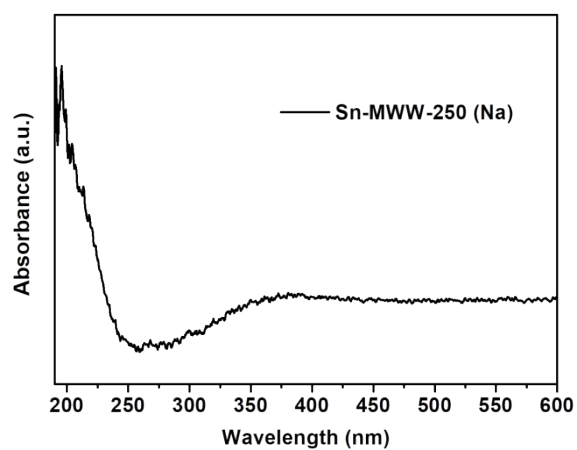

Fig. S6. UV-vis spectrum of Sn-MWW-250 (Na) sample.

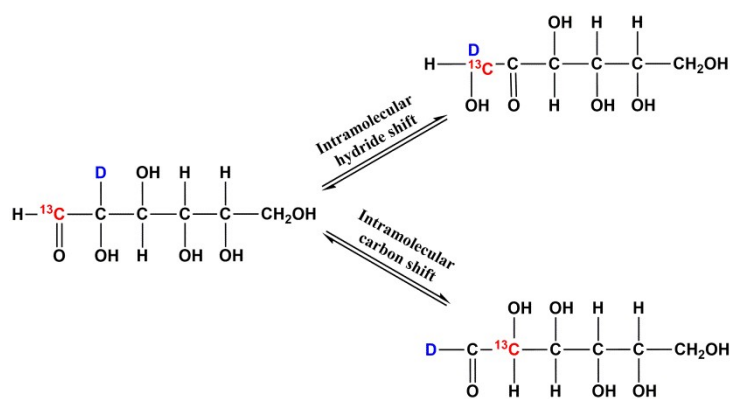

Scheme S1. Reaction routes for isomerization of glucose.
